# Supplementary material
Source: Research Square preprint supplement (doi:10.21203/rs.3.rs-9453242/v1)
Supplement: Supplementary file 1 [file 7497e40449cd21e98264c1ae.docx]

**Supplementary information**

**Metabolic impact of redox perturbations on recombinant protein production in *Komagataella phaffii* under methanolic growth conditions**

Eric Antón, Sergi Monforteǂ, Ane Quesada-Ganuza§, Joan Albiol, Pau Ferrer*

**Author information:**

Department of Chemical, Biological and Environmental Engineering, Universitat Autònoma de Barcelona, Catalonia, Spain

§ Current affiliation: Viralgen, Basque Country, Spain

ǂ Current affiliation: Centrident Pharmaceuticals, Catalonia, Spain

*Corresponding author


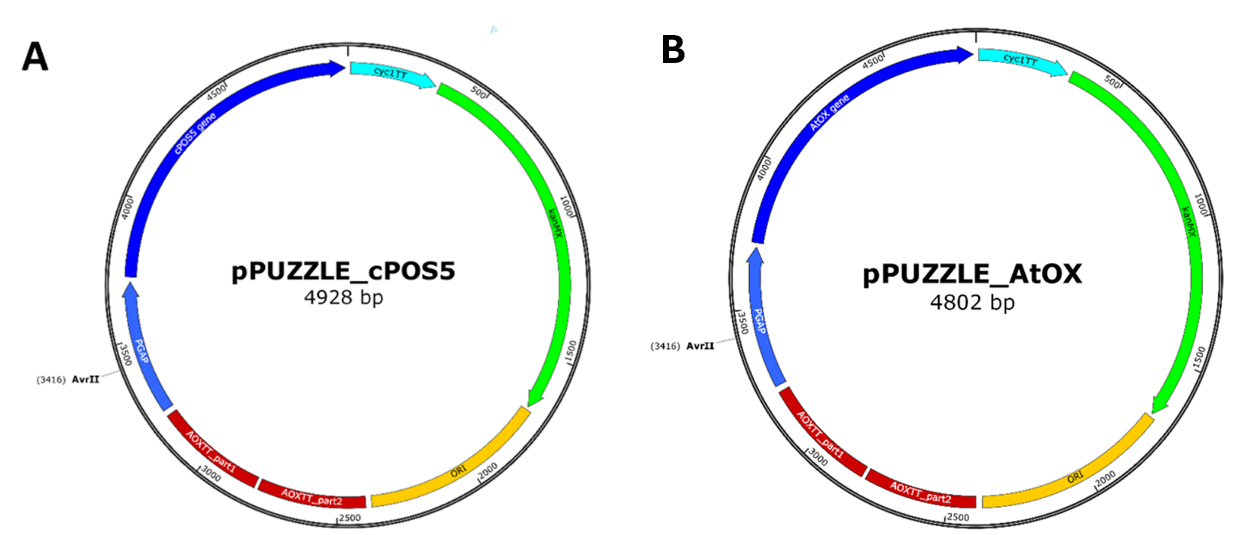


**Supplementary figure I.** Plasmid maps of pPUZZLE_cPOS5 (A) and pPUZZLE_AtOX (B). The restriction enzyme used for plasmid linearization (AvrII) cuts in the middle of pGAP. pPUZZLE contains the kanMX gene for kanamycin resistance in bacteria (*Escherichia coli*) and geneticin G418 resistance in yeast (*Komagataella phaffii*).

**Supplementary figure 2:** *In silico*predicted ATP turnover rate variation caused by NADH kinase (blue line) or alternative oxidase (yellow line) overexpression.

**Supplementary figure 3:** *In silico*predicted mitochondrial NADH/NAD+ turnover rate variation caused by NADH kinase (blue line) or alternative oxidase (yellow line) overexpression.

**Supplementary table 1. Primers used in this study**

| **Primer** | **Sequence (5’-3’)** | **Purpose** |
| --- | --- | --- |
| **pGAP_seq_fw** | **AGGTCGTGTACCCGACCTAG** | cPCR check cPOS5 integration |
| **POS5_seq_rev** | **GAAGATGTCCAAGTTAGTCAAGTGTG** |
| **ACT1_fw** | **TGTCCGGTGGTACTATGTTCC** | cPOS5 gene copy number determination through ddPCR |
| **ACT1_rev** | **GATTCGTCGTACTCTTGCTTTGA** |
| **POS5_dd_fw** | **GGAGTGTCATTGAAGAAGAA** |
| **POS5_dd_rev** | **CGTCAGCAGTAGTTCTAC** |

**Supplementary table 2.**ddPCR analysis results to determine POS5 kinase gene copy number on HcAtOX1 + cPOS5 co-expressing clones (POSNOX) and cPOS5 clones.

| Strain | *POS5* Copy Number |
| --- | --- |
| POSNOX c1 | 0.71 ± 0.01 |
| POSNOX c2 | 1.13 ± 0.02 |
| POSNOX c3 | 2.05 ± 0.63 |
| POSNOX c6 | 3.35 ± 0.02 |
| POSNOX c10 | 2.05 ± 0.16 |
| POSNOX c13 | 2.06 ± 0.63 |
| POSNOX c16 | 3.55 ± 0.01 |
| POSNOX c20 | 12.22 ± 0.00 |
| cPOS5  c1 | 1.95 ± 0.17 |
| cPOS5  c2 | 1.19 ± 0.01 |
| cPOS5  c3 | 0.97 ± 0.01 |
| cPOS5  c4 | 1.24 ± 0.02 |

**Supplementary figure 4.** *In silico*predicted cytosolic NADPH turnover rate variation caused by NADH kinase (blue line) or alternative oxidase (yellow line) overexpression or the combination of both ectopic genes (green line). For the combined mutant simulation the alternative reaction flux was fixed to (0.1 mmol/(gDCW·h)) and progressively augmenting the Pos5 reaction flux


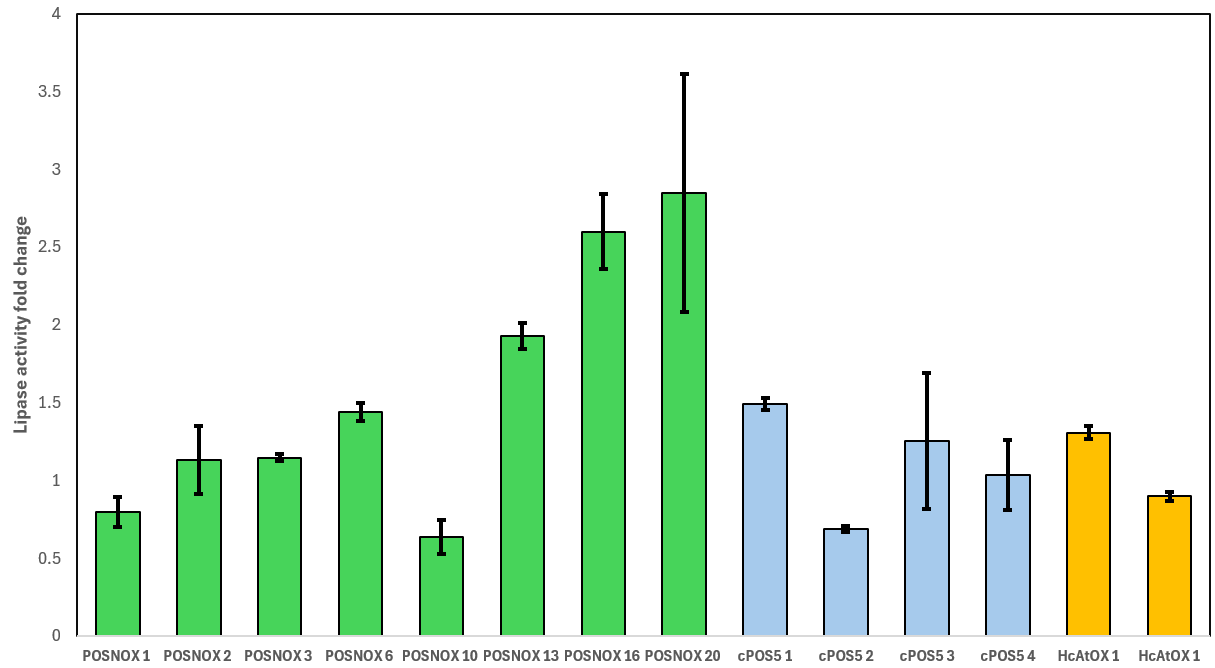


**Supplementary figure 5.**Lipase activity levels (expressed as specific lipase fold change) of cPOS5 and HcAtOX1 + cPOS5 (POSNOX) co-expressing clones with the X-33 Rol strain as reference in small scale cultivations using methanol as carbon source.
